# Supplementary material
Source: publisher site journal article supplement (https://static.cambridge.org/content/id/urn:cambridge.org:id:article:S037689291800005X/resource/name/S037689291800005Xsupp002.docx)
Supplement: Supplementary file 1 [file S037689291800005Xsupp002.docx]

Supplementary Materials (Online Appendix)

**Table S2.**

**Discrepancies in taxonomic nomenclature for rosewood species found in Thailand.** Discrepancies in the scientific and common names of rosewood species protected under Thai law. The issue raised here concerns Burmese rosewood and Burmese paduak where the names used by Thai governments do not match up with the international consensus.

(Word document, 159 kb)

Table S2. **Discrepancies in taxonomic nomenclature for rosewood species found in Thailand.** Discrepancies in the scientific and common names of rosewood species protected under Thai law. The issue raised here concerns Burmese rosewood and Burmese paduak where the names used by Thai governments do not match up with the international consensus.

| **Identification referred to by CITES** | | **CITES listing** | **Included in Hongmu standard1?** | **Identification referred to in Thailand** | | |
| --- | --- | --- | --- | --- | --- | --- |
| **Scientific name** | **Common name** | **Common name**  **(in Thai)** | **Translated common names (English)** | **Other colloquial names2** |
| *Dalbergia oliveri* (or *Dalbergia bariensis*) | Burma pallisander, Burma  Rosewood, Burma  Tulipwood, Pinkwood,  Tamalan tree | CITES Appendix II3 (as of 2016) | Yes | ไม้ชิงชัน (Mai Ching Chan)  (or ไม้พยุงแกลบ (Mai Phayung Klaeb)) | Blackwood, Rosewood5 | ไม้เก็ดแดง (Mai ked dang) ไม้อีเม่ง (Mai ee meng) กระซิบ (Krasib) กำพี้ (Kam pee) เก็ดดำ (Ked dum) ประดู่ชิงชัน (Pradoo chingchan) พะยูงแกลบ (Payung klaeb) พะยูงแดง (Payung dang) พะยูงหิน (Payung hin) |
| *Dalbergia cochinchinensis* | Siamese rosewood | CITES Appendix II4 (increased protective coverage as of 2016) | Yes | ไม้ขะยุง / ไม้พยุง | Siamese Rosewood, Thailand Rosewood5 | กระยง (Krayong) กระยุง (Krayung) ขะยุง (Kayung) แดงจีน (Dang jeen) ประดู่ตม (Pradoo thom) ประดู่ลาย (Pradoo lai) ประดู่เสน (Pradoo sen) พะยูงไหม (Pradoo mai) หัวลีเมาะ (Hua lee moa) |
| *Dalbergia parviflora* | - | CITES Appendix II3 (as of 2016) | No | ไม้กระซิก (Krasik)6 | Blackwood | - |
| *Dalbergia cultrata* | Burmese rosewood | CITES Appendix II3 (as of 2016) | Yes | ไม้กระพี้เขาควาย (Mai Krapee Khao Kwai) | Burma blackwood5 | กำพี้ (Kum pee) มะขามป่า (Makham pa) อีเม็งใบมน (Ee meng bai mon) เก็ดเขาควาย เก็ดดำ (Ked kao kwai ked dum) (Dalbergia assamica) |
| *Pterocarpus macrocarpus* | Burmese Padauk | [Not listed] | Yes | ไม้ประดู่ (Mai Pradoo Pha) | Burmese Rosewood5 | จิต๊อก (Jitok) ฉะนอง (Chanong) ดู่ (Doo) ดู่ป่า (Doo pha) ตะเลอ (Taloe) ประดู่เสน (Pradoo sen) |

1 Treanor, N.B. (2015). China’s Hongmu Consumption Boom: Analysis of the Chinese Rosewood Trade and Links to Illegal Activity in Tropical Forested Countries. Forest Trends. Washington D.C., USA.

2 National Council for Peace and Order (2016) *NCPO* *Order No. 133 Amendment* URL:// http://library2.parliament.go.th/giventake/content_ncpo/ncpo-head-order31-2559.pdf

3 CITES (2016). Consideration of proposals for amendment of appendices I and II (CoP17 Prop. 55). Seventeenth meeting of the Conference of the Parties, 24 September – 5 October 2016, Johannesburg, South Africa.

4 CITES (2016). Consideration of proposals for amendment of appendices I and II (CoP17 Prop. 53). Seventeenth meeting of the Conference of the Parties, 24 September – 5 October 2016, Johannesburg, South Africa.

5 Department of Agriculture. (2016). การตรวจพิสูจนเนื้อไมพะยูง [Rosewood Identification Handbook]. Bangkok, Thailand.

6 Niyomdham C. 2002. An account of Dalbergia (Leguminosae-Papillionoideae) in Thailand. Thailand Forest Bulletin, 30: 124–166.
